# Supplementary material for: Western medical acupuncture in a group setting for knee osteoarthritis: results of a pilot randomised controlled trial
Source: PubMed Central journal article supplement (PMC5153913; doi:10.1186/s40814-016-0051-5), 2016-02-16

## Week 1: After enrolment and randomisation

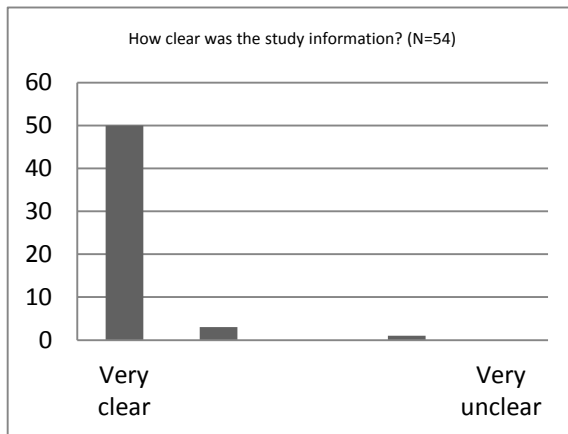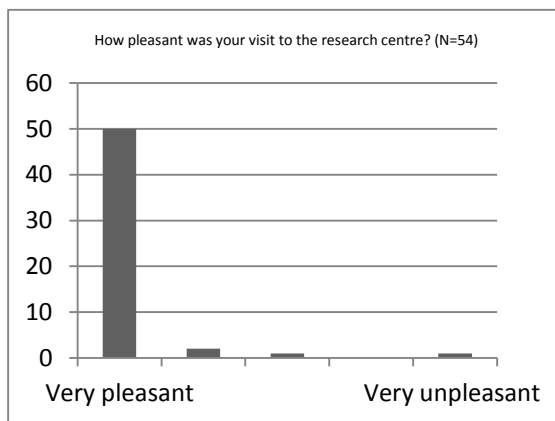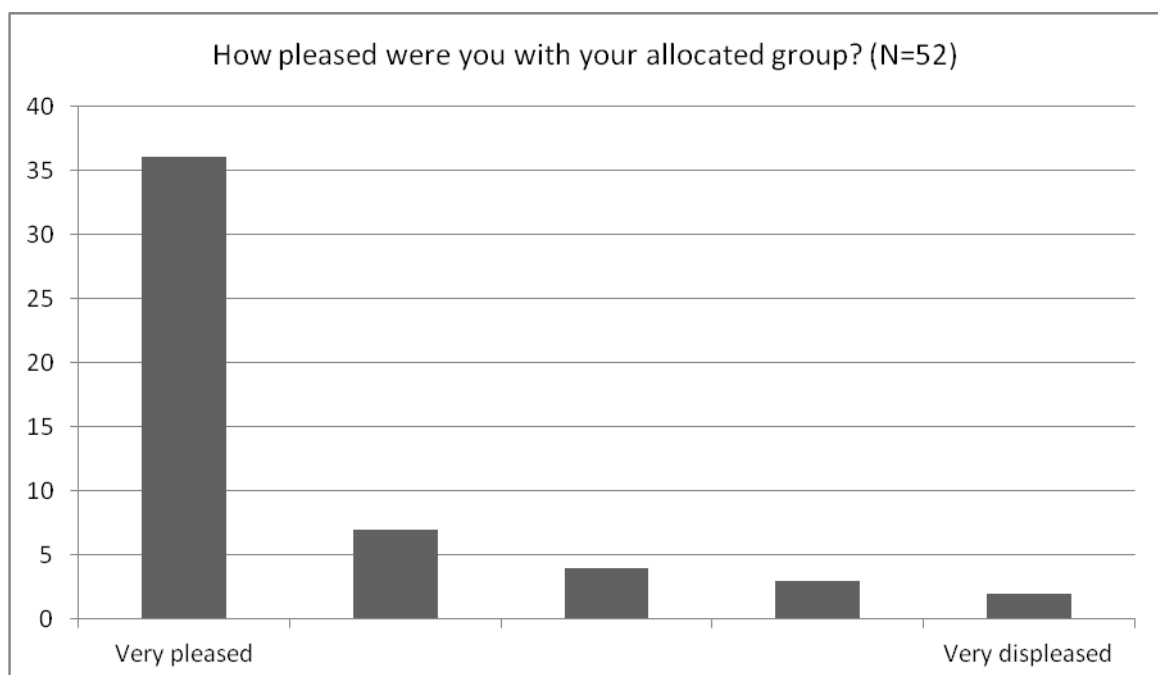

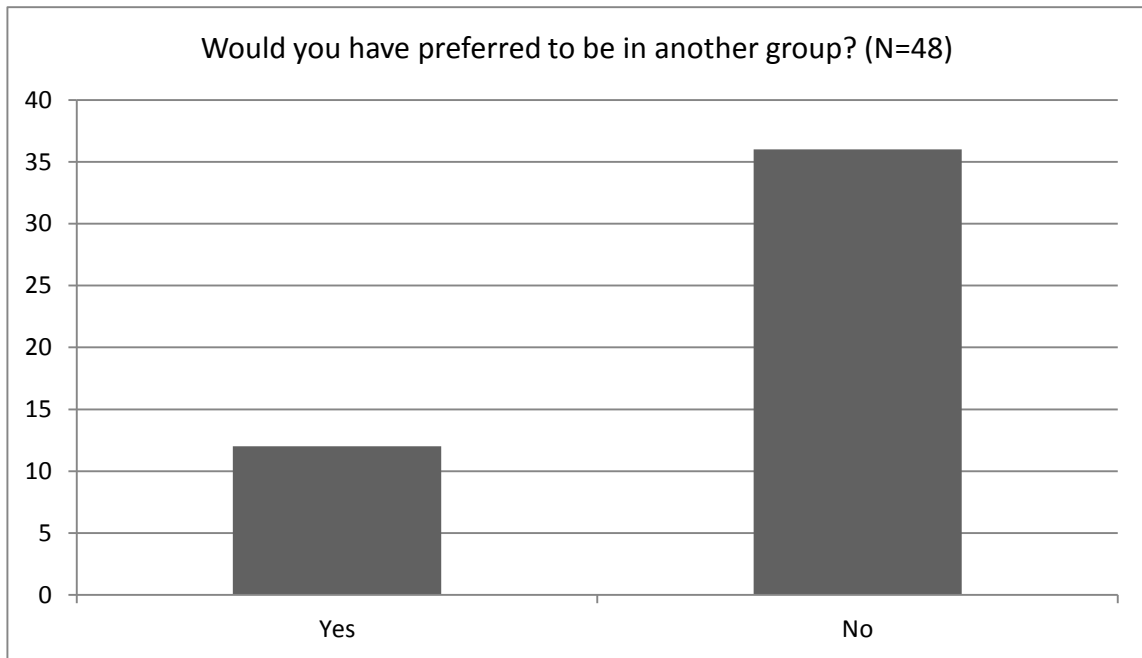

**Treatment week 2: Acupuncture groups only**

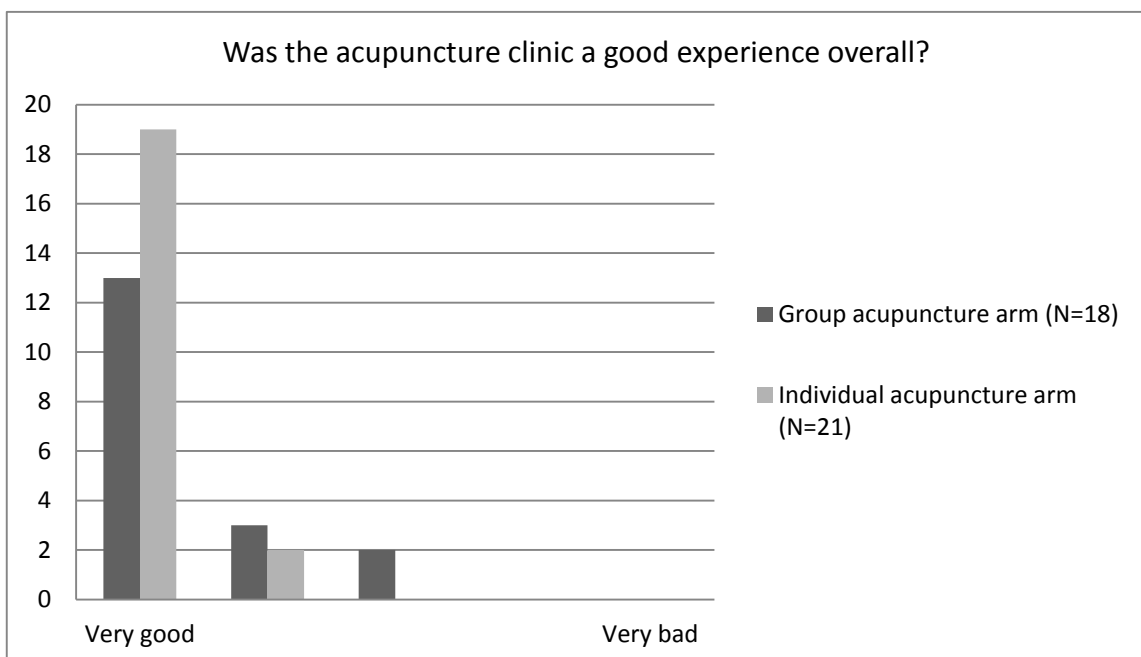

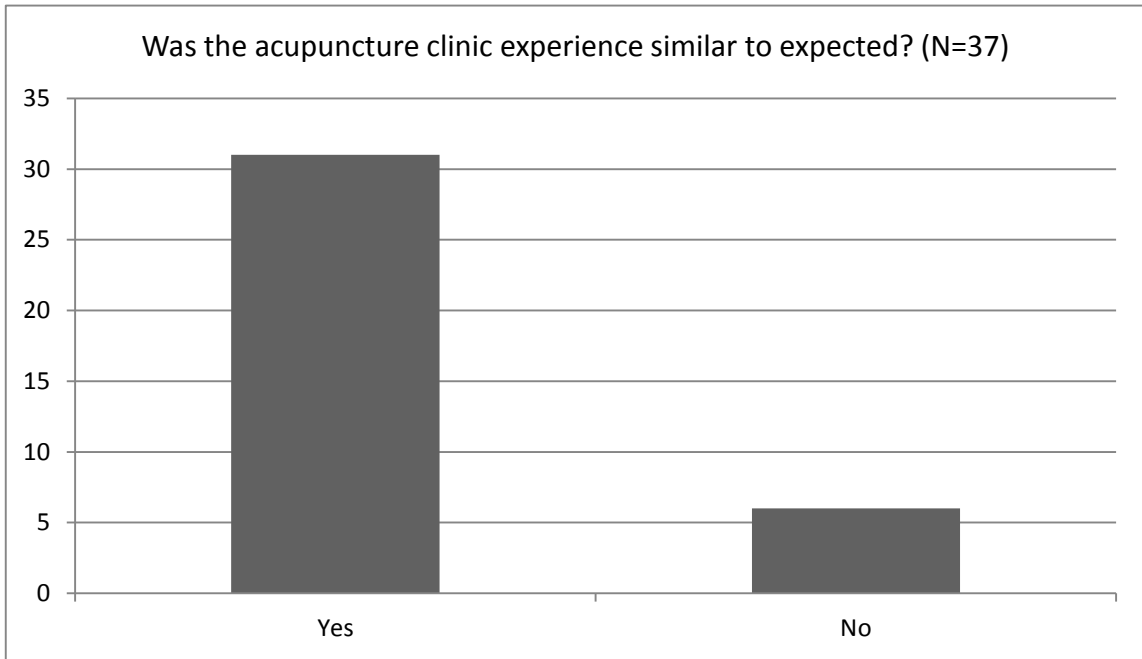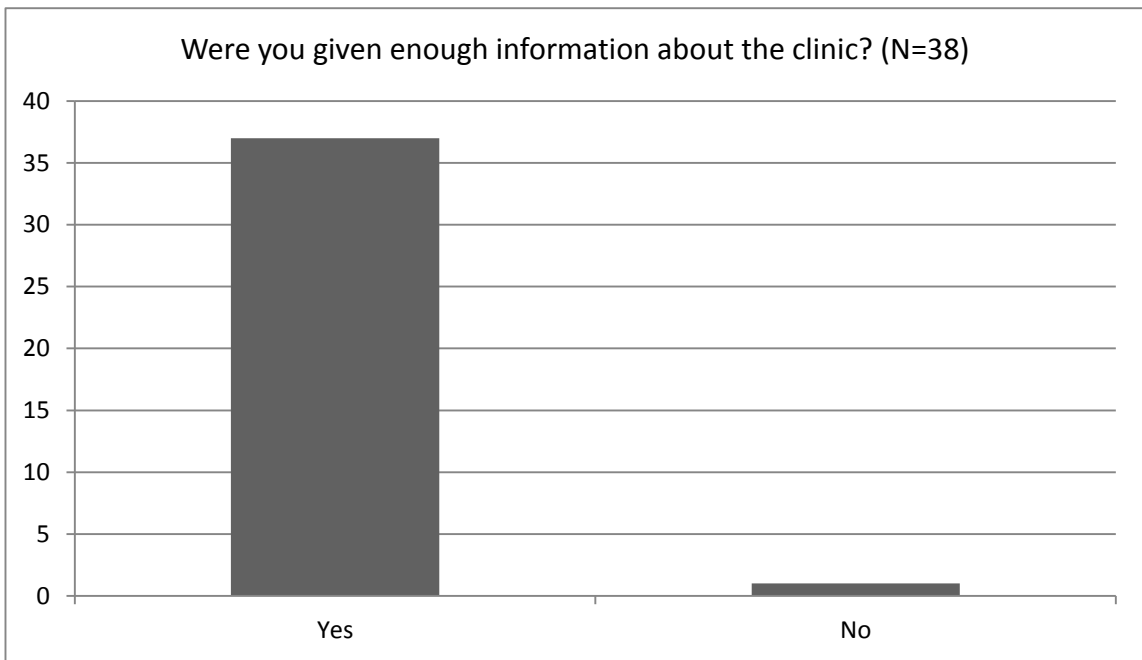

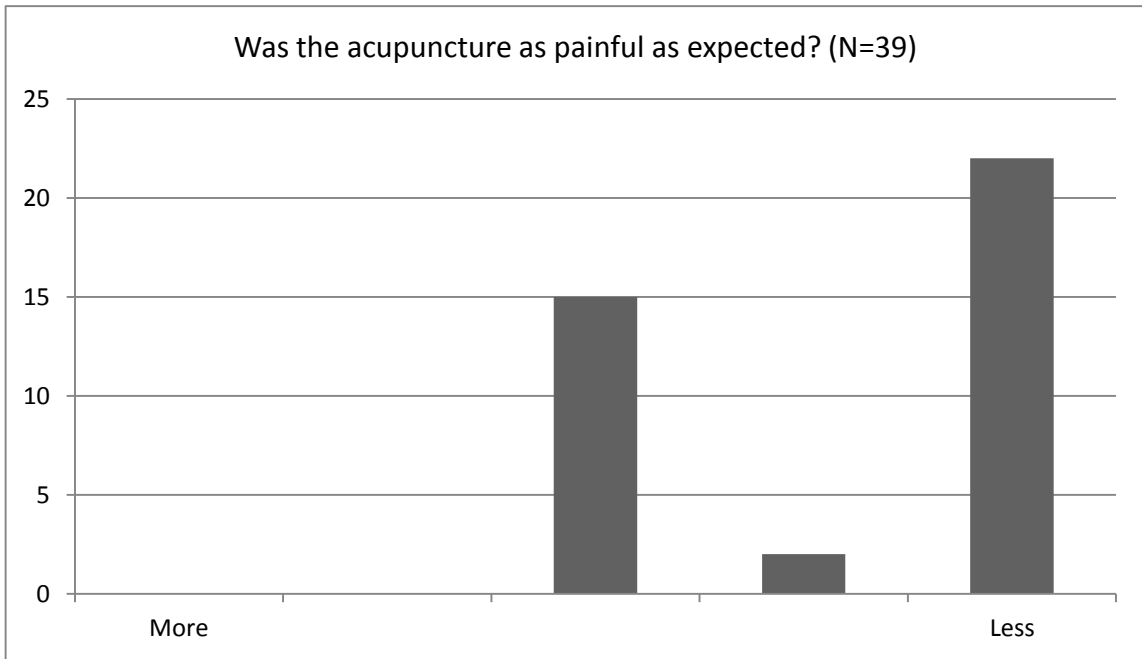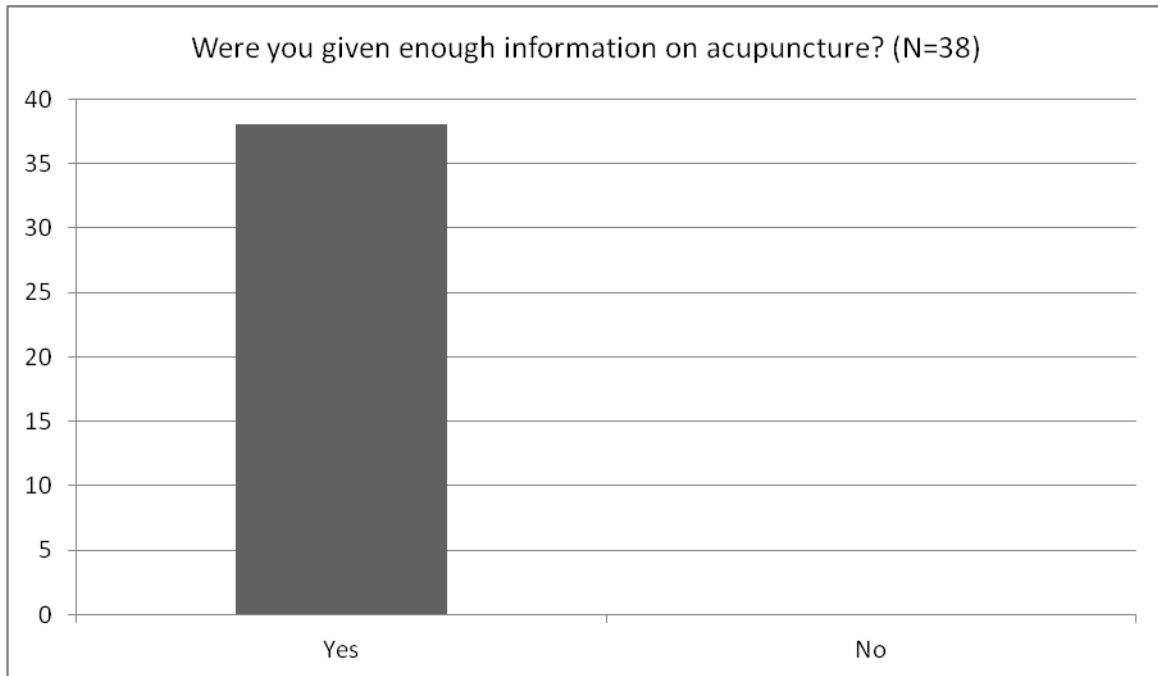

**Week 6**

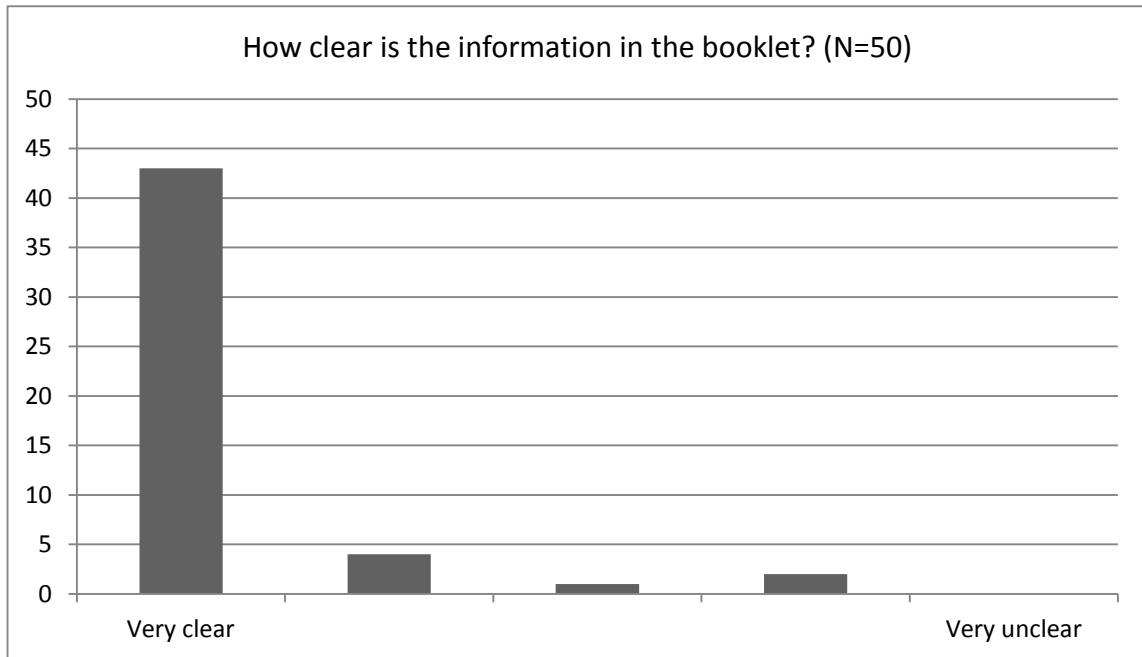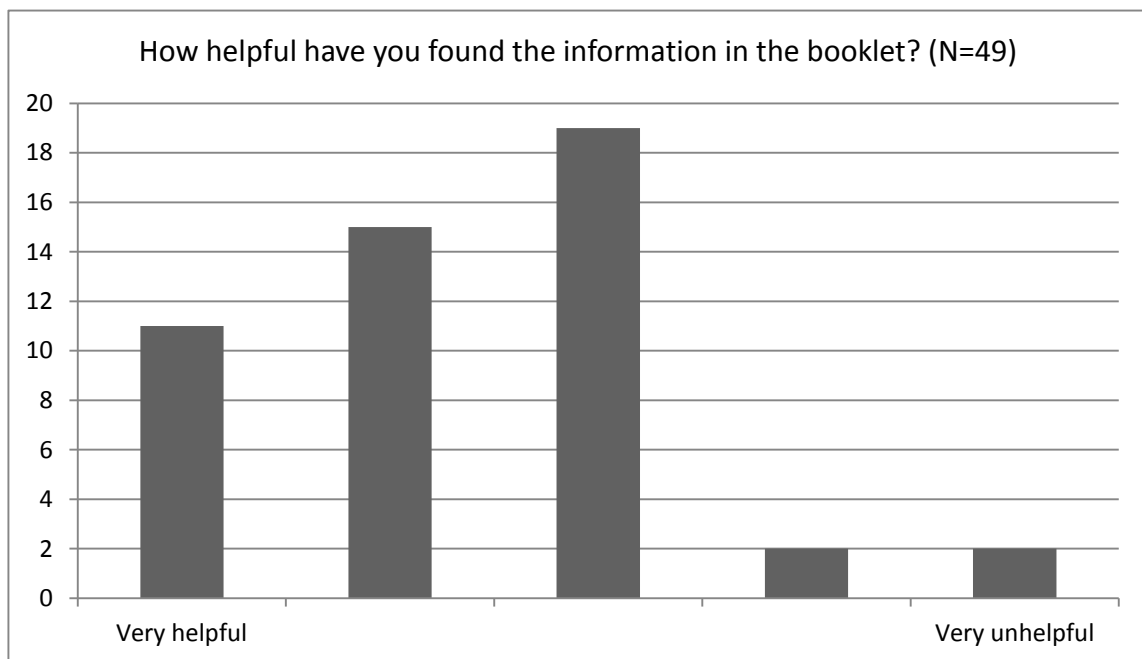

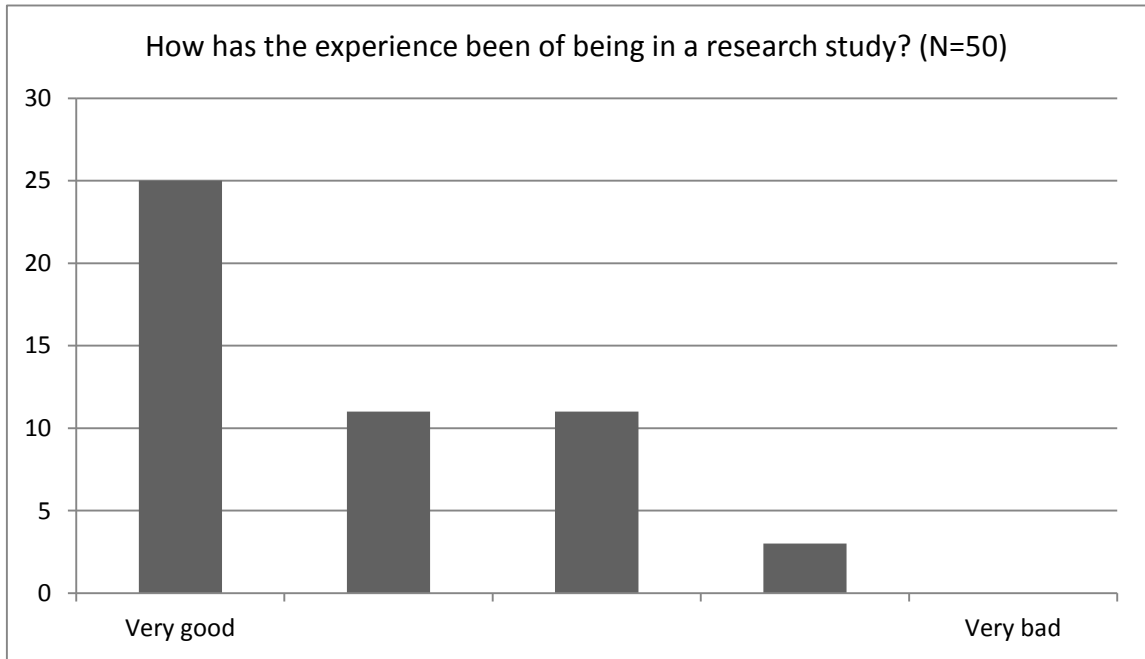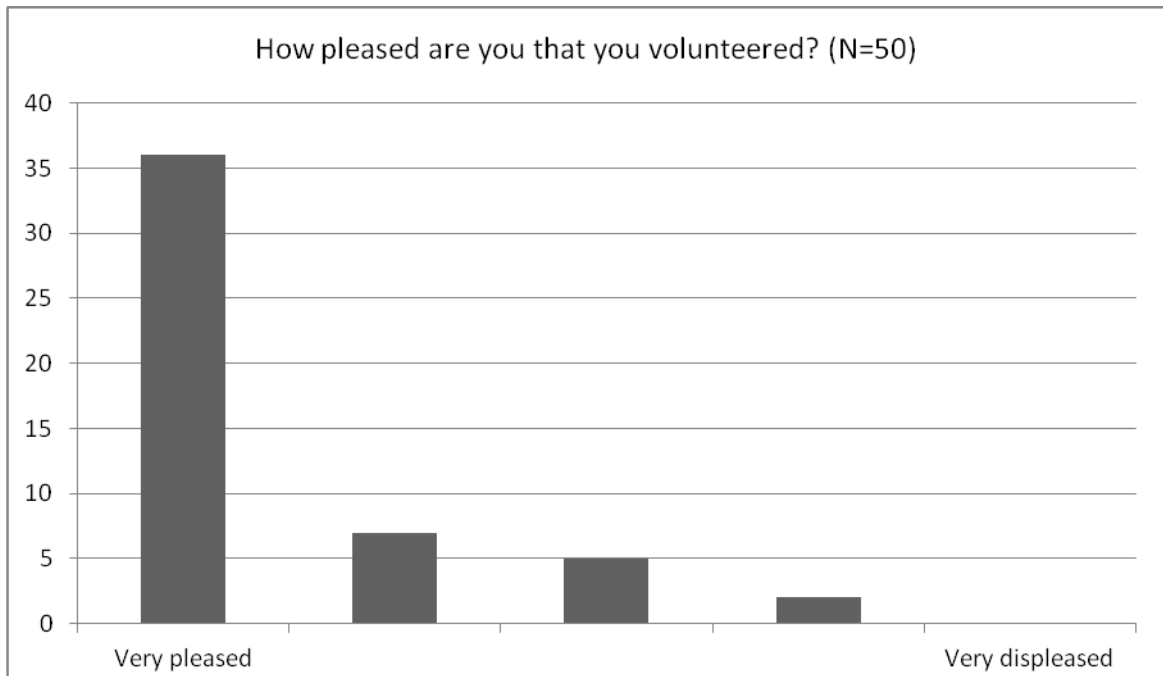

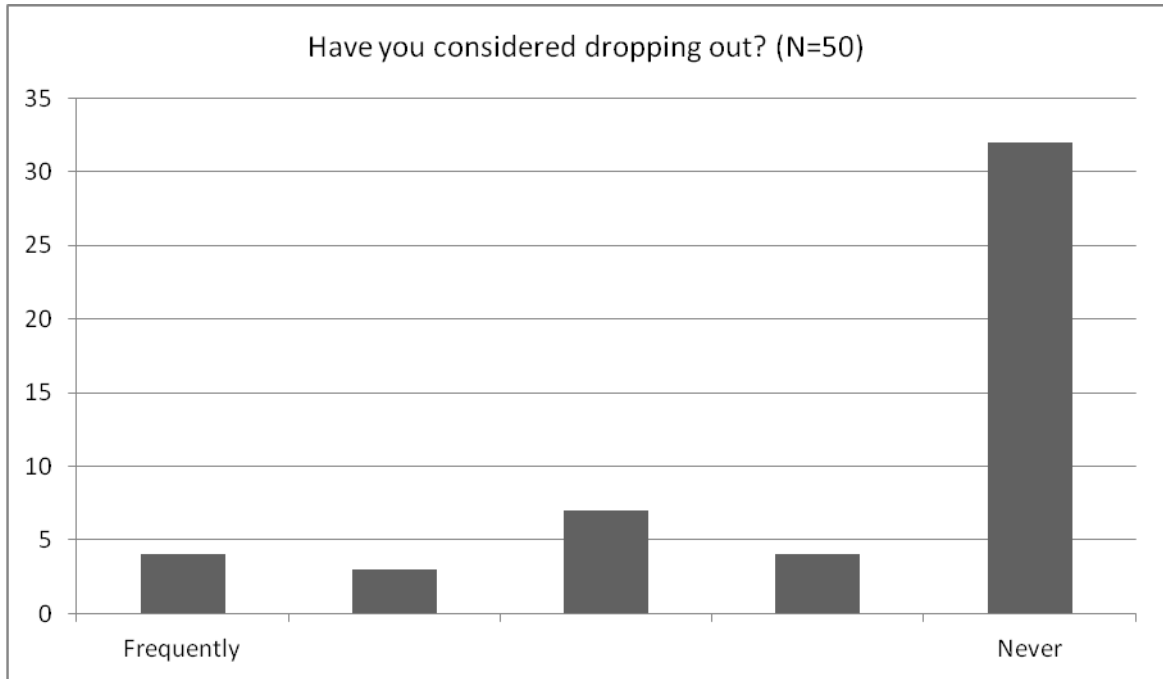

**Week 14**

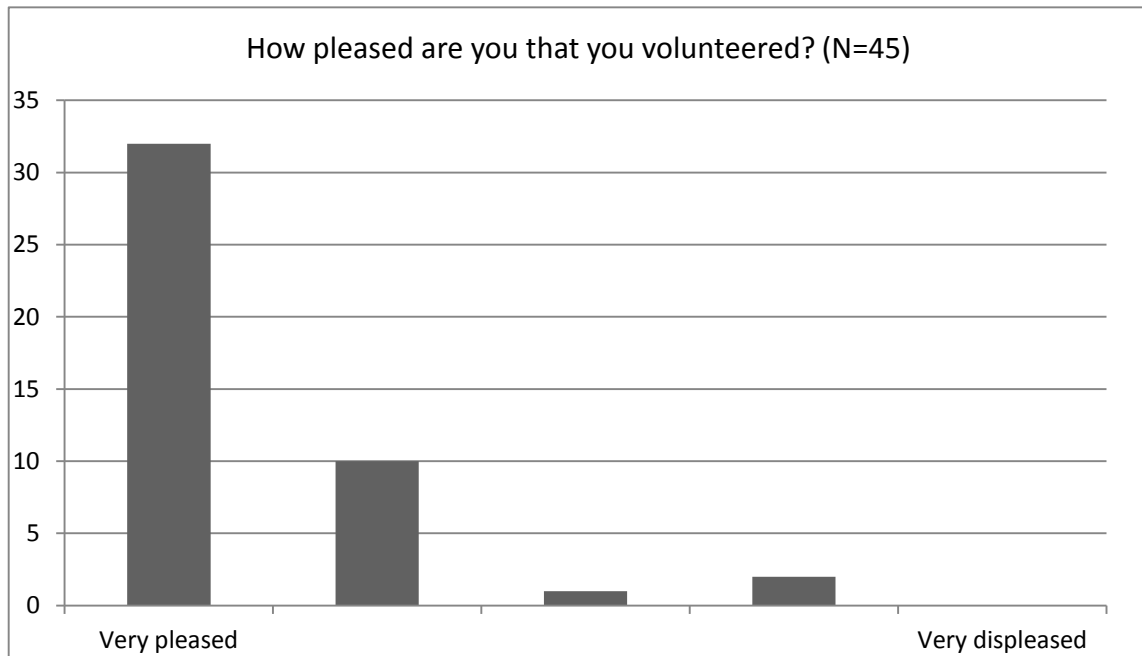



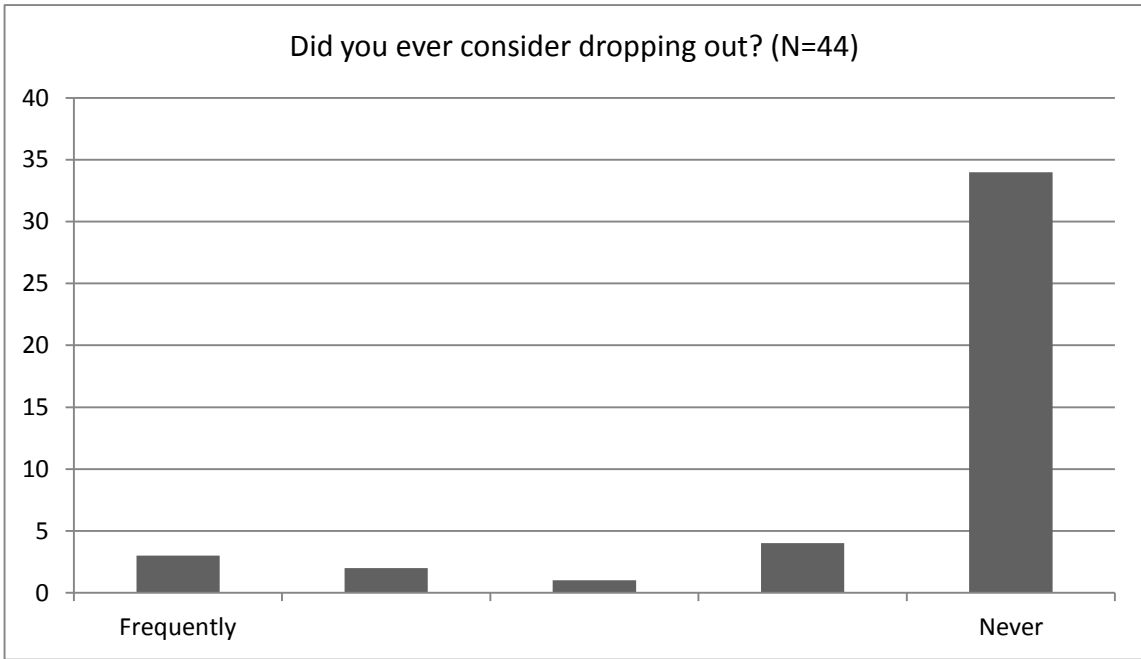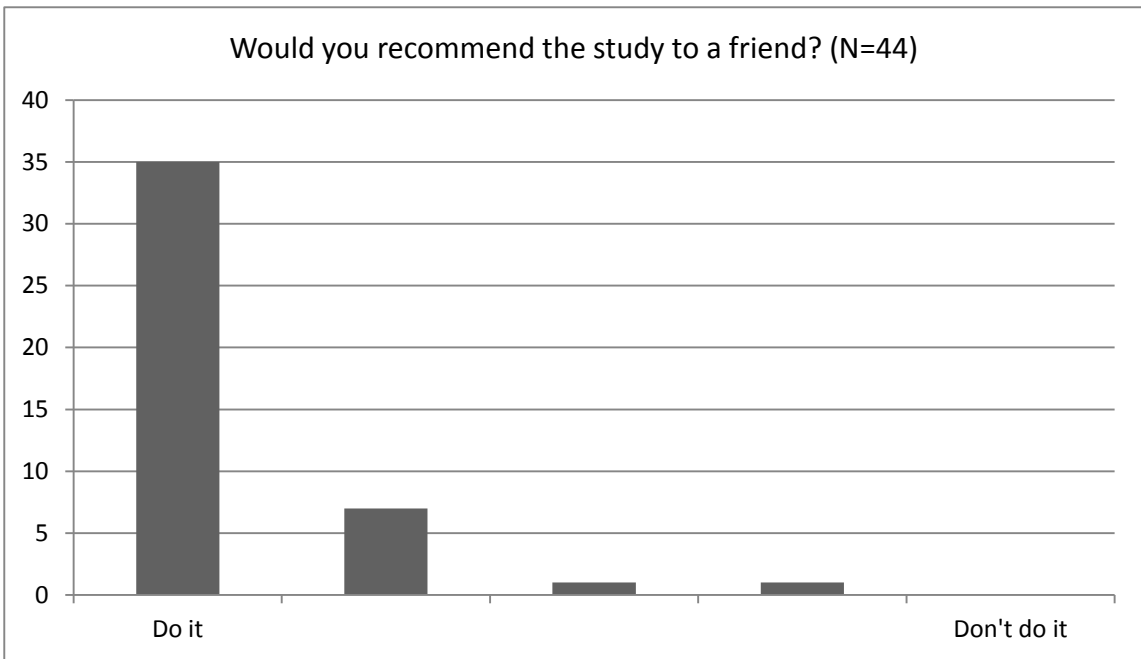

Has any treatment ever helped your knee problem? (N=41)

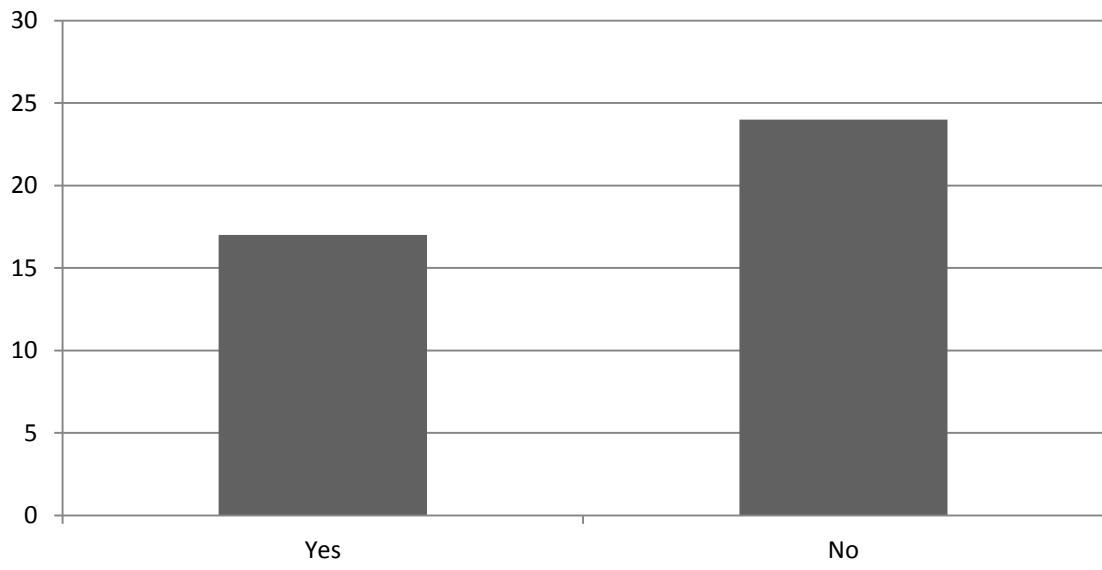

Supplement: 40814_2016_51_MOESM6_ESM.pdf [file 40814_2016_51_MOESM6_ESM.pdf]
